# Supplementary material for: Construction of dual active sites for efficient alkaline hydrogen evolution: single-metal-atoms supported on BC2N monolayers
Source: Royal Society of Chemistry journal article supplement (doi:10.1039/d2cp04242h), 2022-01-01
Supplement: d2cp04242h1.pdf [file d2cp04242h1.pdf]

## Supporting Information

### **Constructing dual active sites for efficient alkaline hydrogen evolution: single-metal-atoms supported on BC<sub>2</sub>N monolayers**

Weichao Kong<sup>1</sup>, Jing Xu<sup>1</sup>, Yanfu Tong, Yanping Ding, Jiajun Wang, Bingyu Li, Wei Xing, Lianming Zhao\*.

School of Materials Science and Engineering, China University of Petroleum (East China), Qingdao, Shandong 266580, P. R. China

<sup>1</sup> These authors contributed equally.

\* Corresponding authors.

E-mail addresses: [lmzhao@upc.edu.cn](mailto:lmzhao@upc.edu.cn)

## Table of contents

1. Lattice parameters and structural parameters of M@BC<sub>2</sub>N
2. Adsorption energies for single/co-adsorbed OH\* and H\* on M@BC<sub>2</sub>N
3. Adsorption energy of single H<sub>2</sub>O\* and H<sub>2</sub>\* on M@BC<sub>2</sub>N
4. Hirshfeld charge for M@BC<sub>2</sub>N
5. Density of states for BC<sub>2</sub>N and M@BC<sub>2</sub>N
6. Stable adsorption configurations for single H\*, OH\*, H<sub>2</sub>O\*, and H<sub>2</sub>\*
7. Bond length of the *ortho*-C-*meta*-C and M-*ortho*-C bonds with and without H adsorption
8. The co-adsorption configurations of H\* and OH\* with H\*
9. Hirshfeld charge of M@BC<sub>2</sub>N after H adsorption
10. Geometries and structural parameters involved in the HER on Fe@BC<sub>2</sub>N
11. Geometries and structural parameters involved in the HER on Co@BC<sub>2</sub>N
12. Geometries and structural parameters involved in the HER on Ni@BC<sub>2</sub>N

**Table S1:** Calculated bond lengths (in Å) and bond angles ( $\theta$  in °) for BC<sub>2</sub>N and M@BC<sub>2</sub>N, M=Fe、Co、Ni.

| Catalysts            |           | C-C   | C-N   | C-B   | B-N   | M-C   | M-N   | $\theta_{N-M-C}$ |
|----------------------|-----------|-------|-------|-------|-------|-------|-------|------------------|
| BC <sub>2</sub> N    | This work | 1.425 | 1.405 | 1.529 | 1.443 | ---   | ---   | ---              |
|                      | Ref. 1    | 1.420 | 1.390 | 1.530 | 1.450 |       |       |                  |
|                      | Ref. 2    | 1.430 | 1.410 | 1.530 | 1.450 |       |       |                  |
|                      | Ref. 3    | 1.400 | 1.350 | 1.490 | 1.430 |       |       |                  |
| Fe@BC <sub>2</sub> N |           | 1.415 | 1.369 | 1.528 | 1.432 | 1.814 | 1.815 | 98.95            |
| Co@BC <sub>2</sub> N |           | 1.413 | 1.366 | 1.529 | 1.435 | 1.810 | 1.814 | 99.54            |
| Ni@BC <sub>2</sub> N |           | 1.411 | 1.378 | 1.531 | 1.437 | 1.804 | 1.806 | 102.40           |

## References

- 1 Y. Shao, Q. Wang, L. Hu, H. Pan and X. Shi, *Carbon*, 2019, **149**, 530–537.
- 2 J. Xie, Z. Y. Zhang, D. Z. Yang, D. S. Xue and M. S. Si, *J. Phys. Chem. Lett.*, 2014, **5**, 4073–4077.
- 3 H. Nozaki and S. Itoh, *J. Phys. Chem. Solids*, 1996, **57**, 41–49.

**Table S2:** Calculated adsorption energy of the single H\* ( $\Delta E_{\text{ads}}(\text{H}^*)$ ) and co-adsorbed H with H\* ( $\Delta E_{\text{co-ads}}(\text{H}^*)$ ), adsorption energy of the single OH\* ( $\Delta E_{\text{ads}}(\text{OH}^*)$ ) and co-adsorbed OH\* with H\* ( $\Delta E_{\text{co-ads}}(\text{OH}^*)$ ) on M@BC<sub>2</sub>N, M=Fe、Co、Ni (in eV).

| Catalysts             | $\Delta E_{\text{ads}}(\text{H}^*)$ | $\Delta E_{\text{co-ads}}(\text{H}^*)$ | $\Delta E_{\text{ads}}(\text{OH}^*)$ | $\Delta E_{\text{co-ads}}(\text{OH}^*)$ |
|-----------------------|-------------------------------------|----------------------------------------|--------------------------------------|-----------------------------------------|
| Fe@BC <sub>2</sub> N  | -0.13                               | -0.32                                  | -0.73                                | -0.28                                   |
| Co@BC <sub>2</sub> N  | -0.40                               | -0.12                                  | -0.85                                | -0.31                                   |
| Ni @BC <sub>2</sub> N | -0.51                               | -0.07                                  | -0.94                                | -0.34                                   |

Note: (1) The corresponding adsorption configurations are shown in Fig. S3 and Fig. S5.

(2) The adsorption energy of the co-adsorbed H ( $\Delta E_{\text{co-ads}}(\text{H}^*)$ ) on substrates was calculated by the equation:

$$\Delta E_{\text{co-ads}}(\text{H}^*) = E_{M@BC_2N+2H} - E_{M@BC_2N+H} - E_H$$

where  $E_{M@BC_2N+2H}$  is the total energy of the M@BC<sub>2</sub>N substrate with adsorbed two H atoms;  $E_{M@BC_2N+H}$  is the total energy of the M@BC<sub>2</sub>N substrate with adsorbed one H atom;  $E_H = 1/2E_{H_2}$ , where  $E_{H_2}$  is the energy of a H<sub>2</sub> molecule.

(3) After OH\* and H\* co-adsorption, the adsorption energy of OH\* ( $\Delta E_{\text{co-ads}}(\text{OH}^*)$ ) was calculated by the equation:

$$\Delta E_{\text{co-ads}}(\text{OH}^*) = E_{M@BC_2N+OH+H} - E_{M@BC_2N+H} - E_{OH}$$

where  $E_{M@BC_2N+OH+H}$  is the total energy of the M@BC<sub>2</sub>N substrate with the co-adsorbed OH\* and H\*;  $E_{M@BC_2N+H}$  is the total energy of the

M@BC<sub>2</sub>N substrate with an adsorbed H atom;  $E_{OH} = E_{H_2O} - 1/2E_{H_2}$ , where  $E_{H_2O}$  is the energy of a H<sub>2</sub>O molecule.

**Table S3:** Calculated adsorption energy ( $E_{\text{ads}}$ ) of  $\text{H}_2\text{O}^*$  and  $\text{H}_2^*$  (in eV) at different sites on  $\text{M@BC}_2\text{N}$ ,  $\text{M}=\text{Fe} \cdot \text{Co} \cdot \text{Ni}$ .

| Sites          | $\text{H}_2\text{O}^*$   |                          |                          | $\text{H}_2^*$           |                          |                          |
|----------------|--------------------------|--------------------------|--------------------------|--------------------------|--------------------------|--------------------------|
|                | $\text{Fe@BC}_2\text{N}$ | $\text{Co@BC}_2\text{N}$ | $\text{Ni@BC}_2\text{N}$ | $\text{Fe@BC}_2\text{N}$ | $\text{Co@BC}_2\text{N}$ | $\text{Ni@BC}_2\text{N}$ |
| M              | -0.96                    | -1.03                    | -1.04                    | -0.54                    | -0.52                    | -0.47                    |
| <i>ortho-C</i> | -0.77                    | -0.85                    | -0.91                    | ---                      | ---                      | ---                      |
| <i>meta-C</i>  | ---                      | ---                      | ---                      | -0.43                    | ---                      | -0.41                    |
| <i>para-C</i>  | ---                      | ---                      | -0.96                    | -0.14                    | ---                      | -0.47                    |
| <i>ortho-N</i> | -0.94                    | ---                      | -0.90                    | -0.34                    | -0.32                    | -0.32                    |
| <i>meta-B</i>  | -0.93                    | ---                      | -0.95                    | ---                      | ---                      | ---                      |

Note: The corresponding adsorption configurations are shown in Fig. S3.

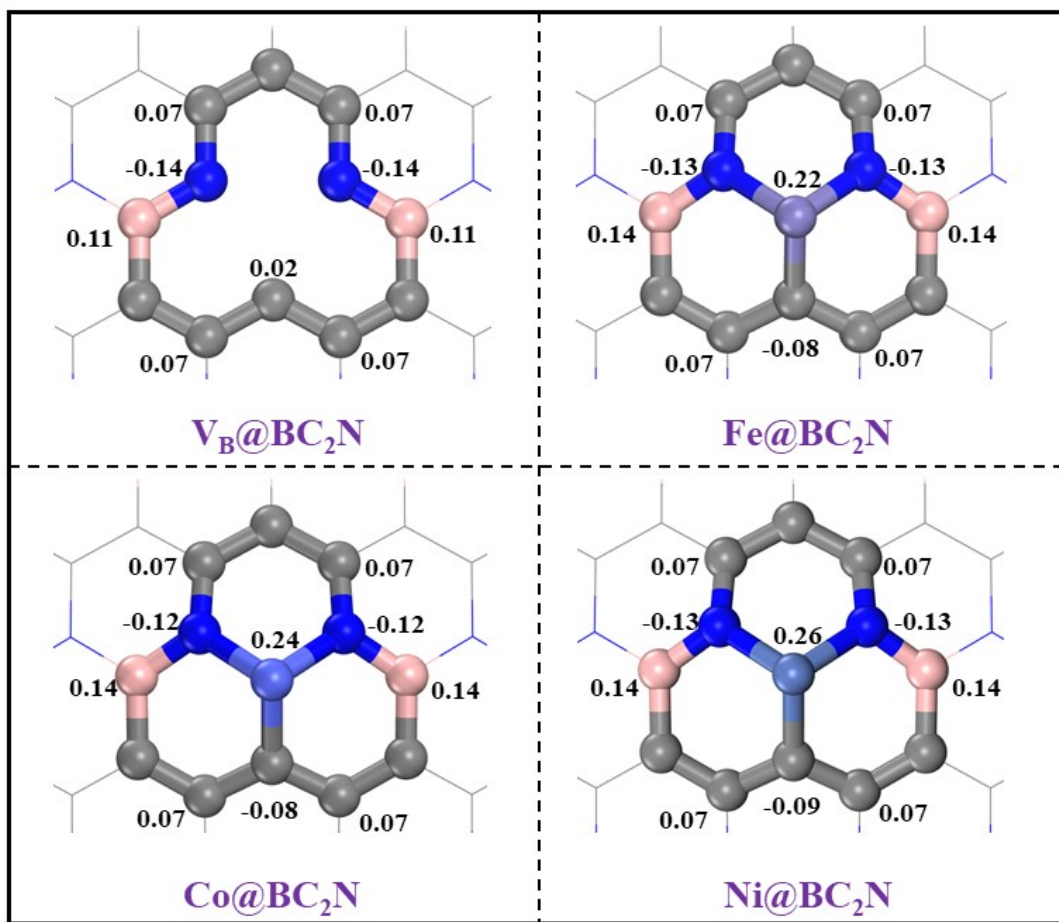

**Fig. S1:** Hirshfeld charge  $q$  (in  $e$ ) for  $V_B@BC_2N$  and  $M@BC_2N$ ,  $M = Fe, Co,$  and  $Ni$ .

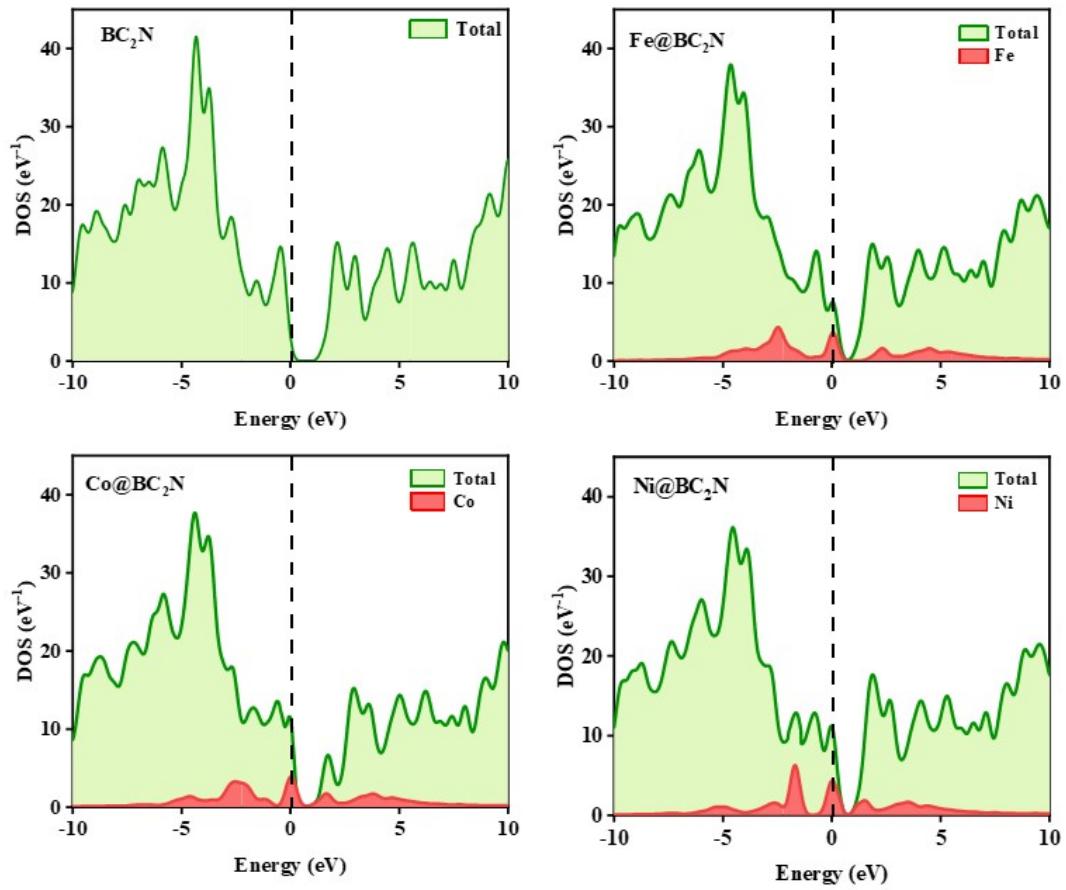

**Fig. S2:** Density of states (DOSs) of  $\text{M@BC}_2\text{N}$ ,  $\text{M} = \text{Fe}, \text{Co}, \text{and Ni}$ . The green area is the total density of states, and the red area is the partial density of states of the metal atoms  $\text{M}$ . The Fermi level marked by black dashed lines is set as the energy zero.



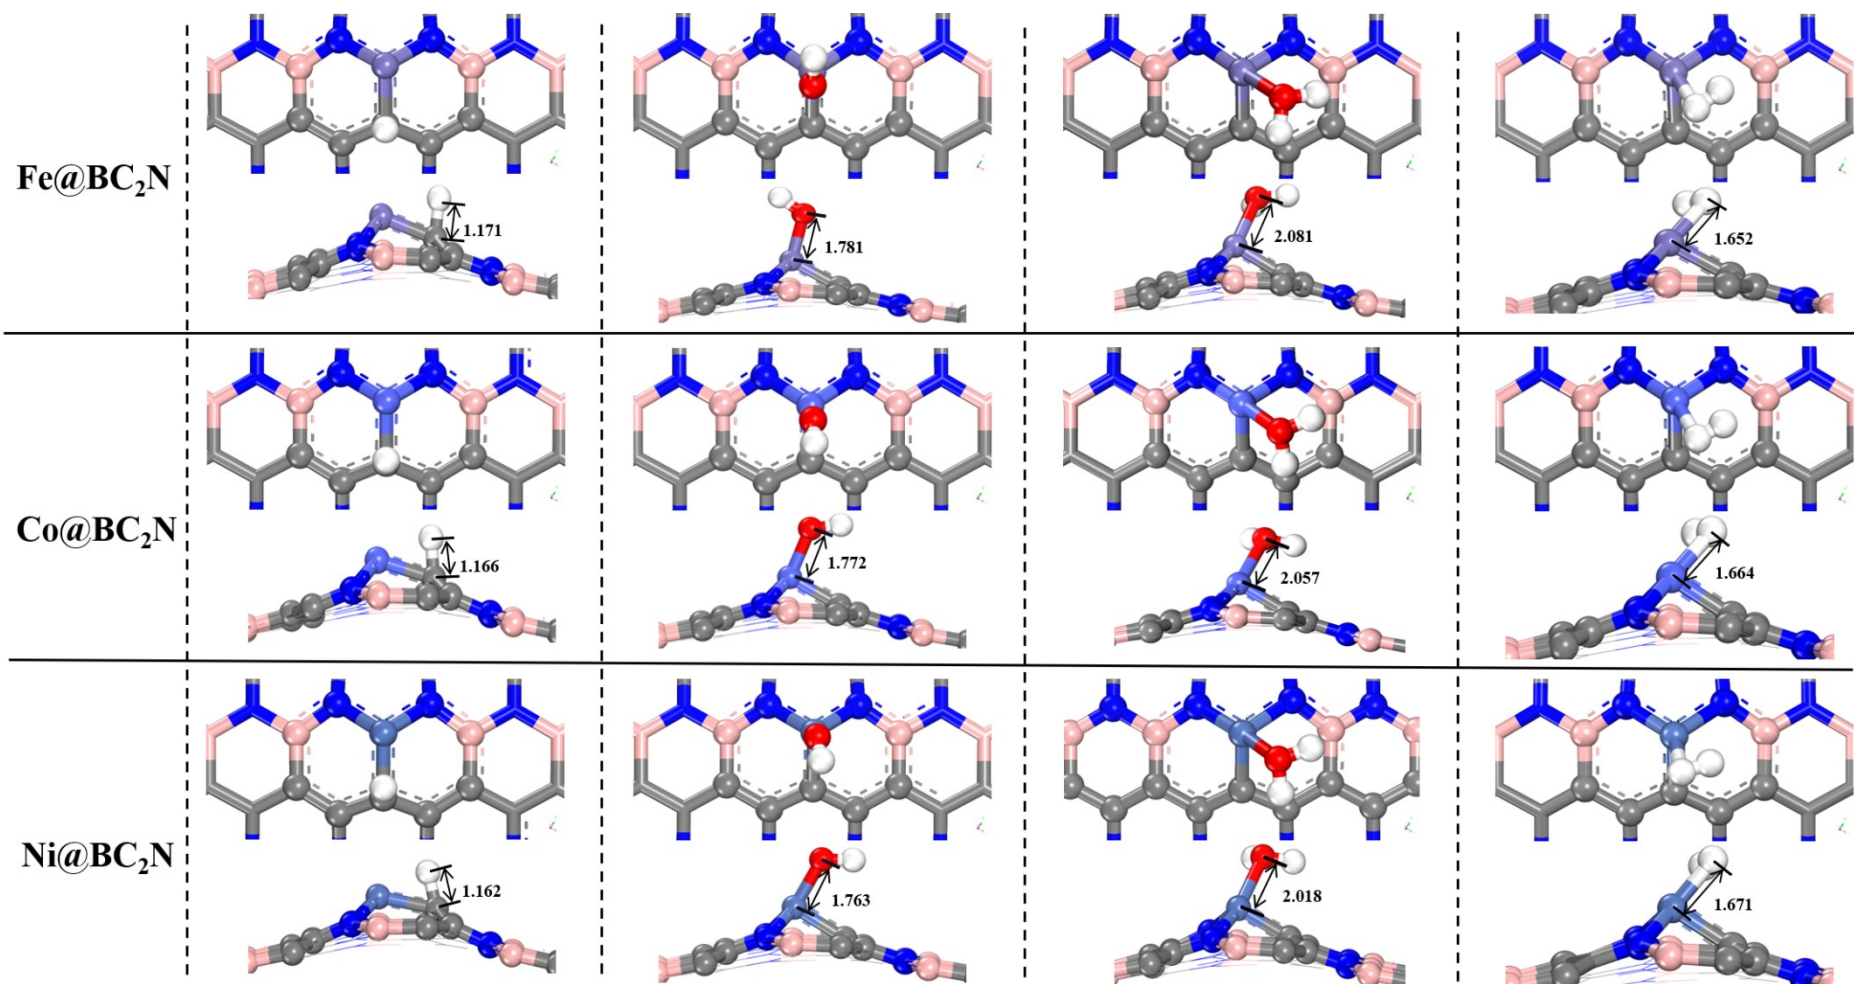

**Fig. S3:** The most stable adsorption configurations with the relevant bond length (in Å) for H\*, OH\*, H<sub>2</sub>O\*, and H<sub>2</sub>\* on the M@BC<sub>2</sub>N catalysts.

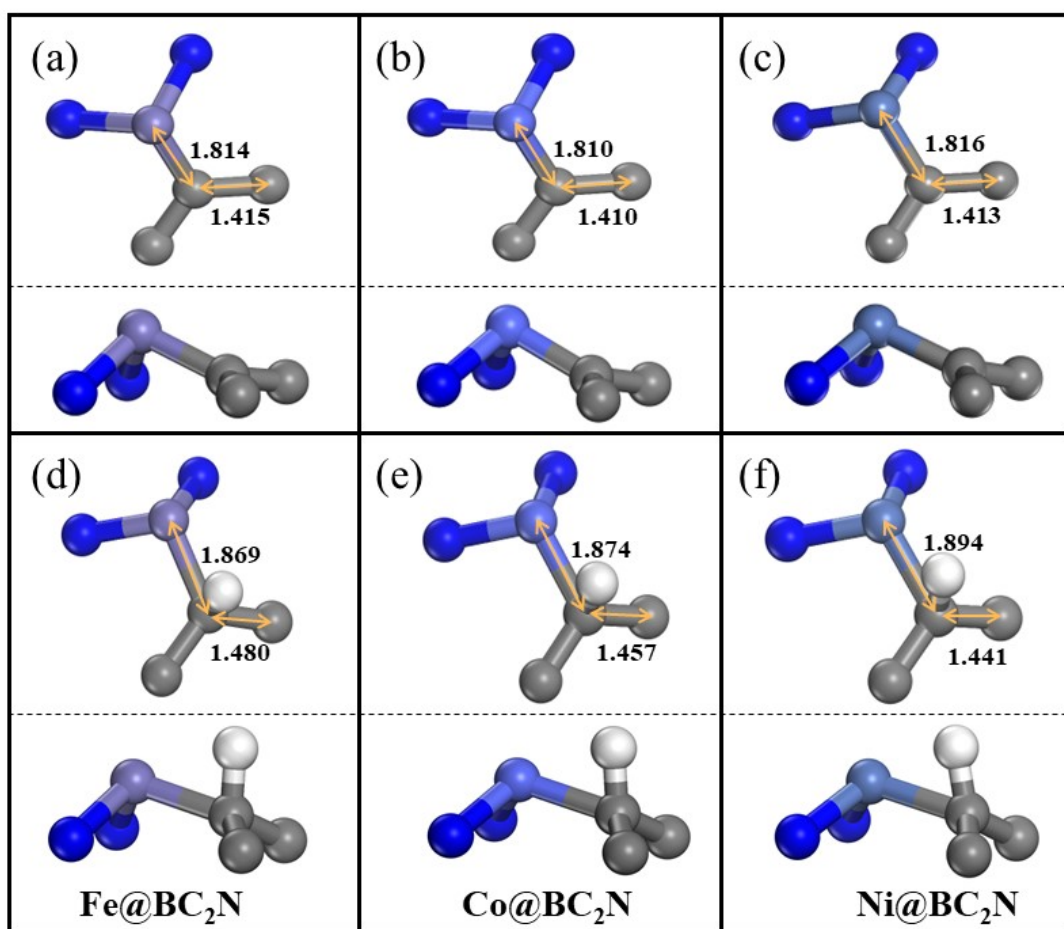

**Fig. S4:** Bond length (in Å) of the *ortho*-C-*meta*-C and M-*ortho*-C bonds (a)-(c) without and (d)-(f) with H adsorption at *ortho*-C for M@BC<sub>2</sub>N, M = Fe, Co, and Ni.

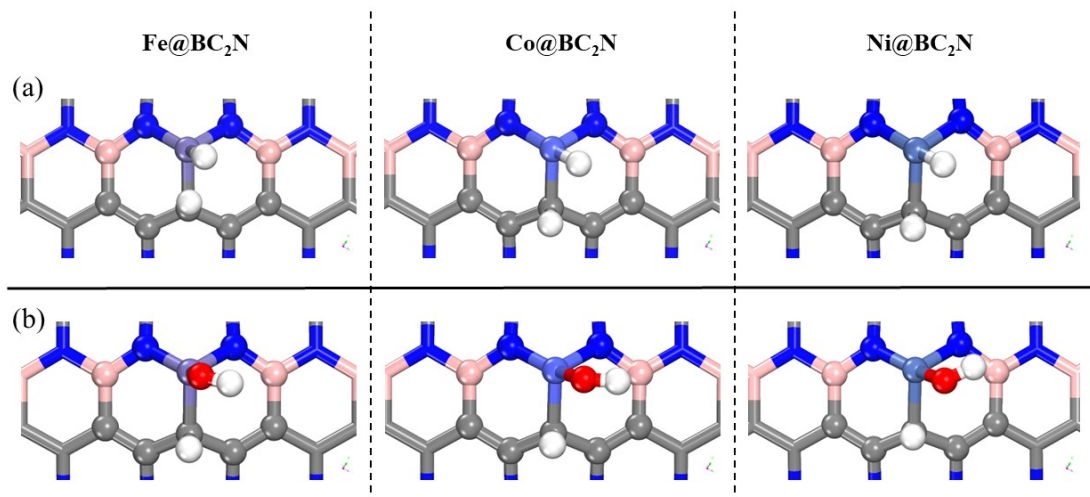

**Fig. S5:** The co-adsorption configurations of (a) double  $\text{H}^*$  and (b)  $\text{H}^*$  and  $\text{OH}^*$  on  $\text{M@BC}_2\text{N}$ ,  $\text{M}=\text{Fe}$ ,  $\text{Co}$ , and  $\text{Ni}$ .

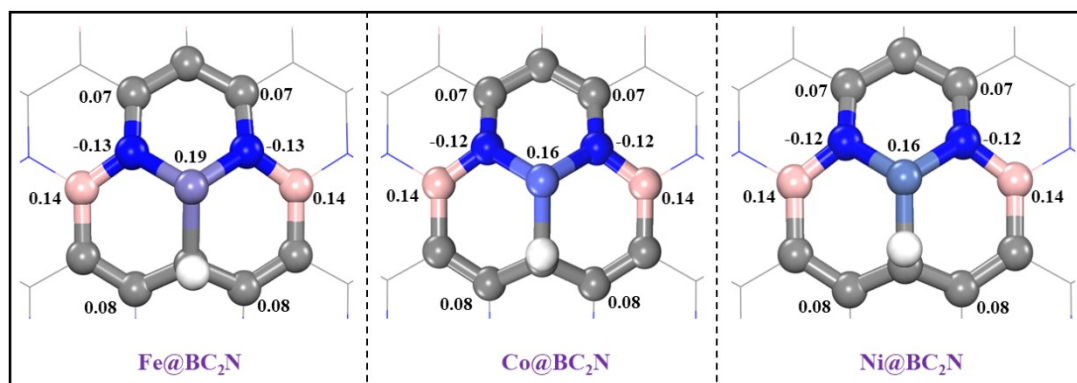

**Fig. S6:** Hirshfeld charge  $q$  (in  $e$ ) after H adsorption at M@BC<sub>2</sub>N, M = Fe 、 Co 、 Ni.

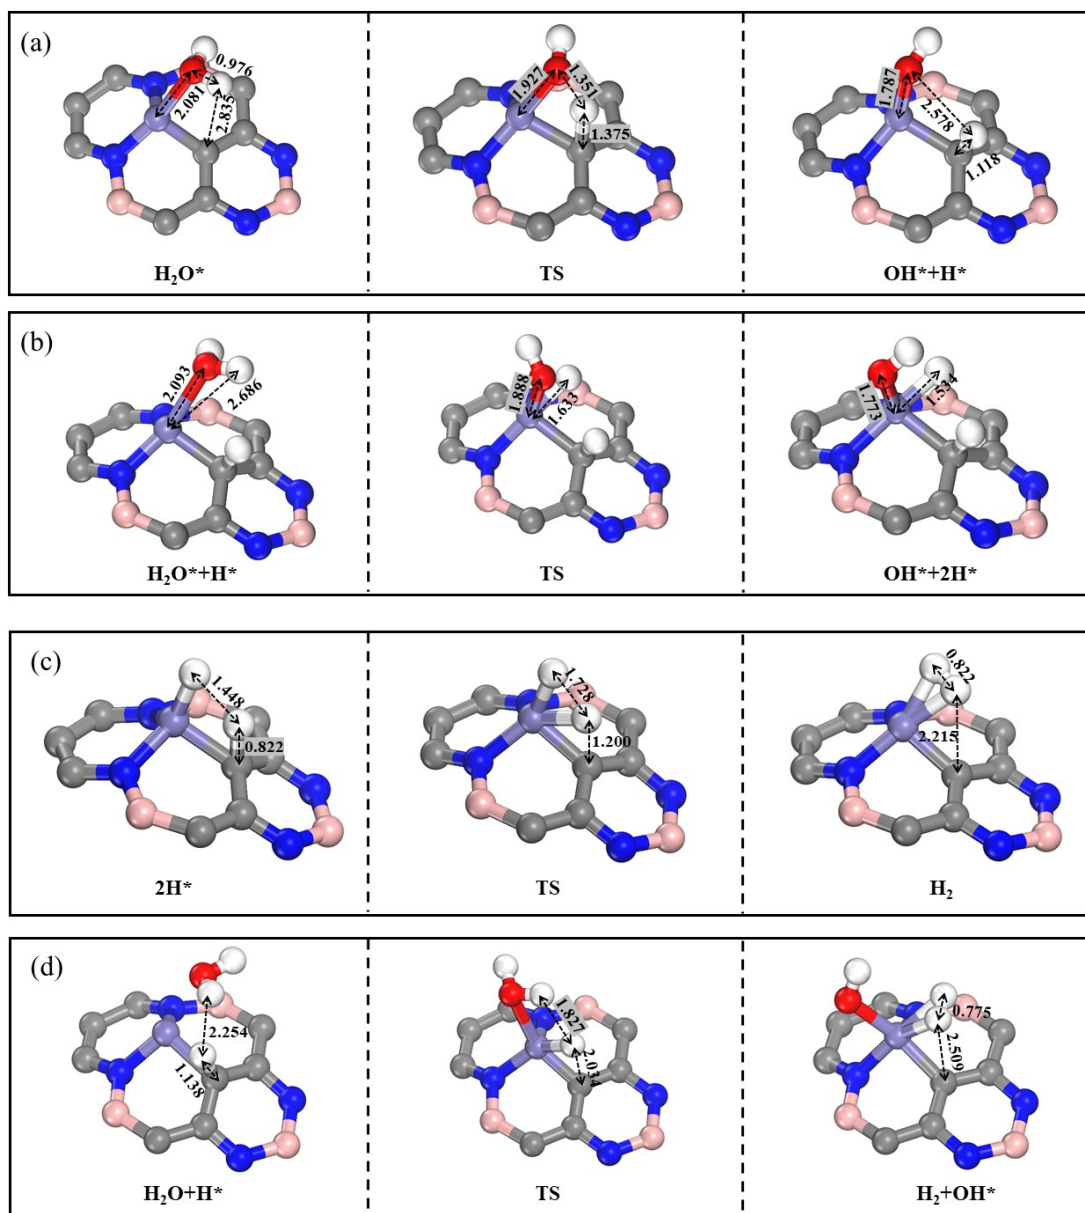

**Fig. S7:** Geometries and selected structural parameters (in Å) involved in the (a) Volmer-I, (b) Volmer-II, (c) Tafel, and (d) Heyrovsky mechanisms on Fe@BC<sub>2</sub>N.

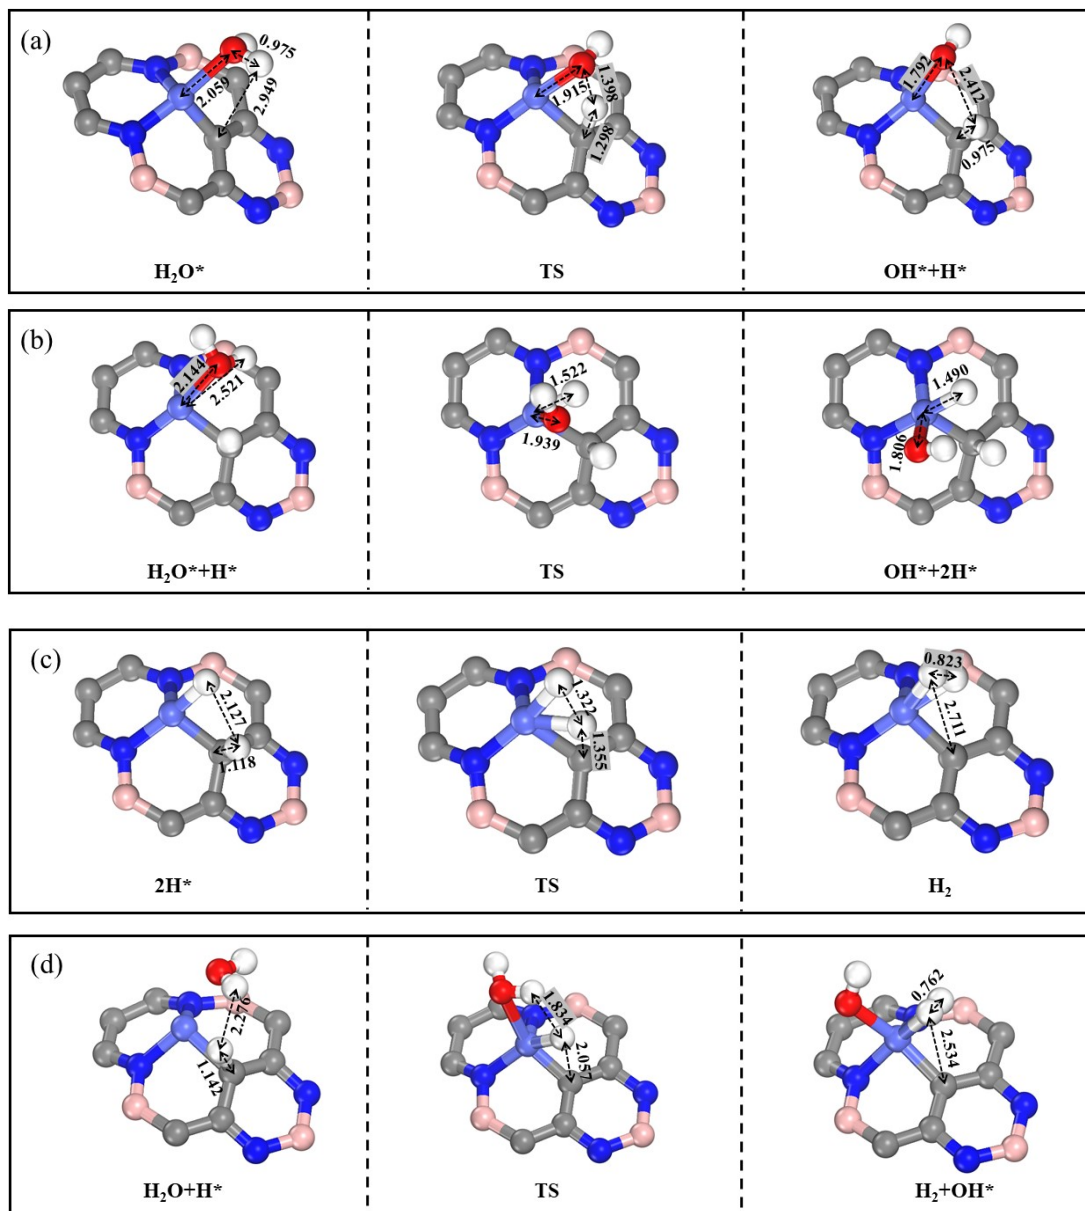

**Fig. S8:** Geometries and selected structural parameters (in Å) involved in the (a) Volmer-I, (b) Volmer-II, (c) Tafel, and (d) Heyrovsky mechanisms on Co@BC<sub>2</sub>N.

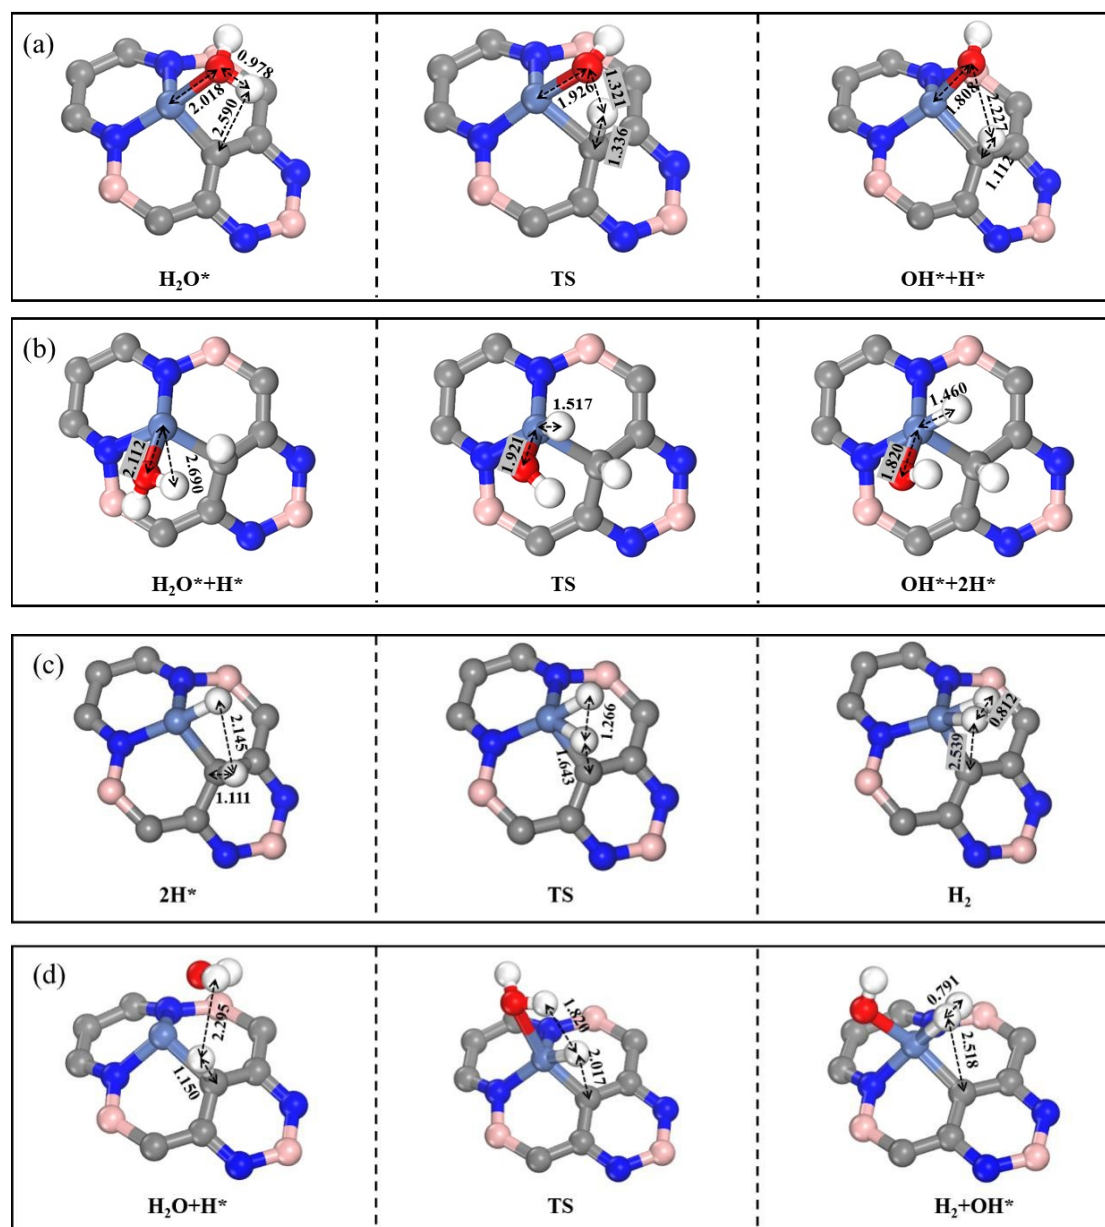

**Fig. S9:** Geometries and selected structural parameters (in Å) involved in the (a) Volmer-I, (b) Volmer-II, (c) Tafel, and (d) Heyrovsky mechanisms on Ni@BC<sub>2</sub>N.
